# Supplementary material for: Identification of the co-expression module-trait relationships and hub genes associated with the diffuse-type gastric cancer
Source: Research Square preprint supplement (doi:10.21203/rs.3.rs-242786/v1), 2021-03-03
Supplement: Supplementary file 2 [file 3d33af0f36455dc7c7e9d6a7.xlsx]

## Sheet: Sheet1
Table1. Number of genes in 10 co-expression modules.
Module corlors	Gene Frequency
turquoise	2156
red	78
yellow	220
black	77
brown	427
magenta	30
green	125
blue	577
pink	58
grey	1244
