# Supplementary material for: Identification of the co-expression module-trait relationships and hub genes associated with the diffuse-type gastric cancer
Source: Research Square preprint supplement (doi:10.21203/rs.3.rs-242786/v1), 2021-03-03
Supplement: Supplementary file 3 [file b933bd0a4d0d8e1c3ff52cb6.xlsx]

## Sheet: string_interactions
Supplementary table 8:The coexpression and combined score between hub genes base on String network in the selected co-expression modules.
node1	node2	coexpression	combined_score
ALDOB	PYGM	0.181	0.511
HSPB6	HSPB8	0.152	0.586
ANGPTL1	MEP1A	0	0.585
ANK2	GNAO1	0.203	0.551
TRPC1	SYPL2	0	0.518
ALDOB	MEP1A	0.23	0.579
ALDOB	NR1I2	0.176	0.555
GNAO1	PDZD4	0.35	0.451
GNAO1	RERG	0	0.492
ANK2	PDZD4	0.179	0.47
ALDOB	HNRNPU	0	0.461
GNAO1	GUCY2C	0.061	0.46
PEG3	ZFP28	0.062	0.449
ANK2	MAP6	0.229	0.448
NR1I2	MEP1A	0.213	0.415
MAP6	GNAO1	0.214	0.414
SALL2	ZFP42	0	0.412
ANK2	PEG3	0.129	0.404
HSPB6	PYGM	0.137	0.495
RNF150	HSPB8	0.076	0.489
ANK2	LRCH2	0.147	0.487
SALL2	PDZD4	0.181	0.481
GUCY2C	MEP1A	0.182	0.481
MAP6	PDZD4	0.176	0.476
GPRASP1	GNAO1	0.169	0.469
ANK2	RERG	0	0.465
GUCY2C	RERG	0.061	0.46
GPRASP1	PDZD4	0.152	0.451
LRCH2	GNAO1	0.077	0.45
